# Supplementary material for: Multiple stimuli triggered structural isomerization of copper iodide–pyridine crystals
Source: Royal Society of Chemistry journal article supplement (doi:10.1039/d1ce01395e), 2021-12-10
Supplement: d1ce01395e1.pdf [file d1ce01395e1.pdf]

## Supporting information

### Multiple Stimuli Triggered Structural Isomerization of Copper

#### Iodide-pyridine Crystals

Quanxiang Han, Xin Ye,\* Xiaoxin Zheng, Qing Guo, Qinglian Lin, Cuicui Li, Jinke Jiang, Yang Liu\* and Xutang Tao\*

State Key Laboratory of Crystal Materials, Shandong University, Jinan, Shandong 250100, P. R. China

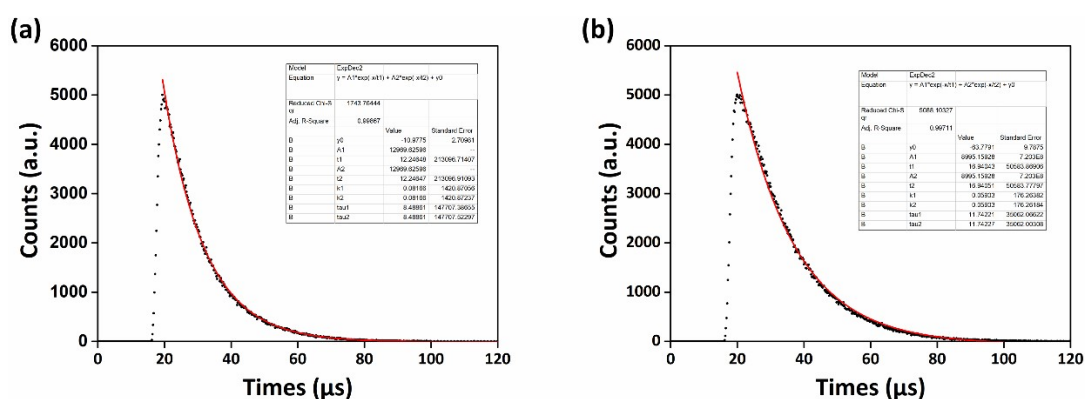

**Figure S1.** PL life time of [CuI(py)]<sub>n</sub> (a) and [CuI(py)]<sub>4</sub> (b). Time-correlated single photon counting (TCSPC) method<sup>1</sup> was used to evaluate the life time data of the isomers.

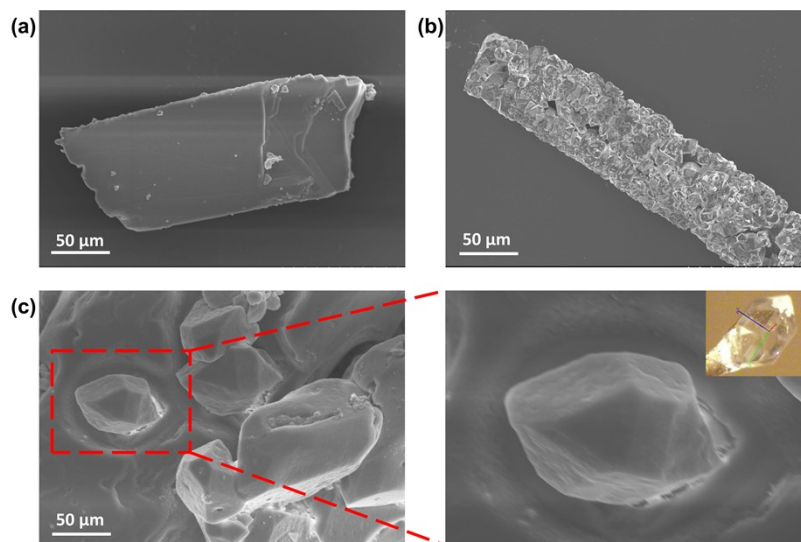

**Figure S2.** SEM pictures of several [CuI(py)]<sub>n</sub> samples. (a) The single crystal stick, which was not suffered acetone atmosphere, shows a smooth surface. (b) After the isomerization caused by the treatment of acetone, the surface of sample became rugged. (c) Picture of partial stick, the isomerization of which was terminated, and the detail picture on the right shows it has the same morphology with the [CuI(py)]<sub>4</sub> single crystal, besides, the inset of detail picture shows the [CuI(py)]<sub>4</sub> single crystal and its orientation.

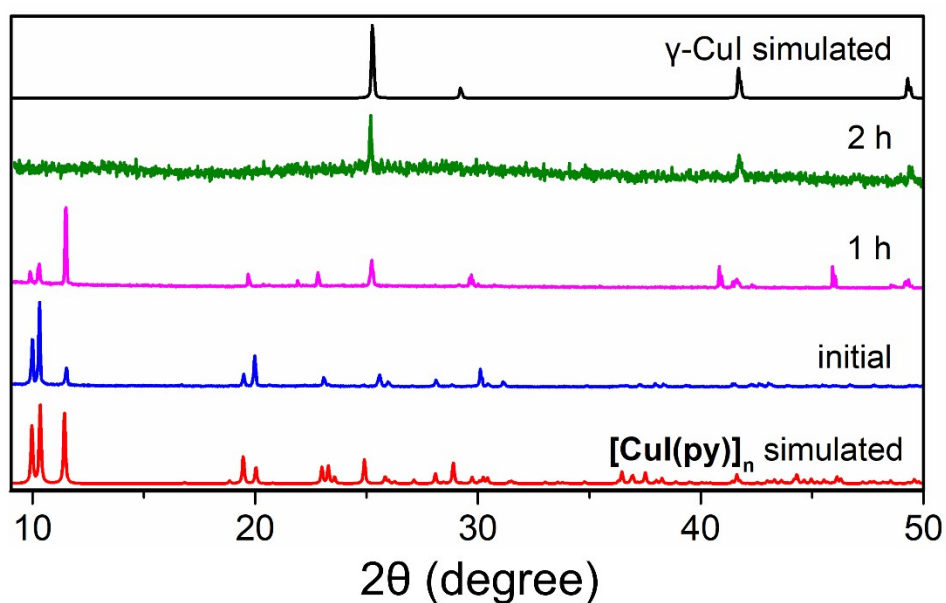

**Figure S3.** PXRD patterns of the  $[\text{CuI}(\text{py})]_n$  sample after exposed in an unconfined space with flowing acetone atmosphere.

|                       | initial | 1h    | 2h     | 6h     | 24h    |
|-----------------------|---------|-------|--------|--------|--------|
| dichloromethane       | blue    | blue  | white  | yellow | yellow |
| methanol              | blue    | blue  | blue   | blue   | yellow |
| acetonitrile          | blue    | blue  | blue   | yellow | yellow |
| trichloromethane      | blue    | blue  | white  | yellow | yellow |
| toluene               | blue    | blue  | blue   | blue   | yellow |
| tetrahydrofuran       | blue    | blue  | white  | yellow | yellow |
| ethyl acetate         | blue    | blue  | blue   | blue   | yellow |
| ethanol               | blue    | blue  | blue   | blue   | blue   |
| dimethyl sulfoxide    | blue    | blue  | blue   | white  | yellow |
| N,N-dimethylformamide | blue    | white | yellow | yellow | yellow |
| acetone               | blue    | white | yellow | yellow | yellow |

**Table S1.** Luminescent behaviors of the  $[\text{CuI}(\text{py})]_n$  samples exposed in different solvents. Luminescence under 365nm UV light of the samples were observed by naked eye.

## Reference

1. R. M. Ballew and J. Demas, *Analytical Chemistry*, 1989, **61**, 30-33.
